# Supplementary material for: Wnt inhibition alleviates resistance to immune checkpoint blockade in glioblastoma
Source: Research Square preprint supplement (doi:10.21203/rs.3.rs-3707472/v1), 2023-12-26
Supplement: Supplementary file 1 [file 701ac835d0920c2f092bdf46.docx]

**Supplementary materials**

**Supplementary Methods**

**Flow cytometry**

Flow cytometry experiments were performed as previously described 1. Tumors were micro-surgically isolated under a stereo-fluorescent microscope and weighed. Tumors were placed immediately in HBSS and manual mincing produced a single-cell suspension. Samples were then individually filtered through 70-μm nylon strainers and incubated for 10 min on ice with rat anti-mouse CD16/CD32 mAb (clone 2.4G2/93) in PBS containing 2% BSA. After cell counting, samples were incubated for 45 min on ice in darkness with the following conjugated antibodies from Biolegend at a dilution of 1:200: CD45 PerCP-Cy5.5 (clone 30-f11), CD103 PE-Cy7 (clone 2E7), CD11b PE-Dazzle (clone M1/70), CD11C-FITC (clone N418), CD80 BV421 (clone 16-10A1), CD40 PE-Cy5 (clone 3/23), CCR7 BV605 (clone 4B12), Ly6G-BV650 (clone 1A8), Ly6C APC (clone HK1.4), TCR PE-Dazzle (H57-597), CD4 FITC (GK1.5), CD8-AP700 (clone 53-6.7), CD127 Pe-Cy7 (clone A7R34), CD25 AP-Cy7 (clone PC61). Intracellular staining for ki-67 was performed after cellular permeabilization. Briefly, cells were fixed using a Foxp3/ Transcription Factor staining Buffer Set (eBioscience) for 15 min, followed by the addition of a permeabilization buffer. Cells were recovered by centrifugation. After washing steps with 2% BSA, the cells were filtered, and flow cytometry was performed on 1–1.5 million cells per individual sample on a BD LSRFortessaTM X-20. Intracellular staining was carried out using a primary antibody against Ki-67-APC (clone 16A8). All flow cytometric analyses were performed post hoc using FlowJo v10.1. Viable cells were identified based on side and forward scatter. Percentages were calculated over CD45+ cells or TCR+ cells.

***In vivo* Treatment**

6-8 weeks old C57BL/6 mice were implanted with 30,000 005GSC-GFP cells (unless specified) each and tumor growth was monitored via ultrasound. Mice were randomized at 3-4 mm3 (unless specified) into control, WNT974, αPD1, and WNT974+αPD1. Mice were treated with 250ug αPD1or rat IgG i.p. once every 3 days for a total of 6 doses for survival studies and 4 doses for time-matched analyses. We had previously published that 5mg/kg of WNT974 once a day for 28 days was well tolerated and crossed the blood-brain barrier in mice 2. In the current work, WNT974 or equivalent methylcellulose was given by oral gavage at the dose of 5mg/kg for 28 days followed by 2.5mg/kg for 28 days for survival studies and 5mg/kg once daily for 15 days for time-matched analyses.

**Human samples**

This study was approved by the Institutional Review Board at Brigham and Women’s Hospital (BWH). 15 human GBM samples were identified through the surgical pathology files at the BWH. All of the patient samples were de-identified prior to the study. Patient samples were collected as part of Standard of Care (SoC) treatment. No informed consent was obtained since this was a retrospective study in which excess tissue was used from otherwise consented procedures as part of routine clinical care. Patient records were reviewed for age, sex, medical history, surgical intervention, therapeutic regimen, IDH1 mutation status, MGMT promoter methylation, and overall survival. A commercial human GBM tissue array containing 70 GBM patient samples and 10 normal brain tissue samples was purchased from US Biomax (GL805e).

**Western blot**

Total cell lysate or nuclear-fractionated lysate was collected from cells/tissues in RIPA buffer supplemented with proteinase and phosphatase inhibitor cocktails, resolved by SDS-PAGE, and immunoblotted using standard techniques per the datasheet. 1: 1000 of Rabbit Wnt7b: Abcam #ab94915, 1:500 Rabbit Wnt5a Cell signaling #2392, 1:1000 of Rabbit Wnt7a: Abcam #ab100792, 1:1:1000 LEF-1: Cell signaling #2230, 1:1000 of Beta-catenin: Cell signaling #8480, 1: 1000 of mTOR: Cell signaling #2983S, 1:1000 of p-GSK alpha and beta: Cell signaling #8566S, 1:1000 of p-mTOR Ser 2448 Cell signaling #2971, 1:1000 of p-p44-42 MAPK (ERK1/2) Thr202/Tyr204 Cell signaling #4370S, 1: 1000 of Rabbit Wnt7b: ProSci #16-831, 1:1000 of Rabbit pLRP6 (Ser 1490) #2568, 1:1000 of Rabbit Cyclin D1: Cell signaling #55506 and 1:5000 of mouse Beta-actin: Sigma, #A5441.

**Quantitative real-time PCR**

For qRT-PCR the protocol from 2 was followed. Cells were lysed using RLT buffer. RNA was cleaned up with an RNeasy Kit (Qiagen) and DNAse-digested to remove DNA contamination. 100–500 ng of purified RNA was retro-transcribed using the High-Capacity RNA to cDNA Master Mix. qPCR was performed using SYBR Green master mix in Light-cycler 480 with specific primers designed for the Wnt pathway. GADPH was used as a housekeeping control. Reference genes and experiments were performed in duplicates for each sample.

**Generation of Wnt7b-/- cells**

Two Wnt7b CRIPSR gRNA constructs, (gRNA 1 and gRNA 6, targeting exons 1 and 6) were purchased from (Gen Script:[https://www.genscript.com/gRNA-detail/mouse/22422/Cas9/Wnt7b-CRISPR-guide-RNA.html#grna](https://www.genscript.com/gRNA-detail/mouse/22422/Cas9/Wnt7b-CRISPR-guide-RNA.html%23grna)). The empty backbone vector (eSpCas9-LentiCRISPR v2) was used for control cells. Lentiviral particles were produced in-house following standard lab protocols. These particles were used to transduce 005GSC neurospheres. Virally transduced 005GSC cells underwent puromycin selection (0.5 μg/ml). Resistant cells were plated at low density by serial dilution in order to derive colonies originating from single cells. Individual colonies were assayed for Wnt7b protein levels and clonogenicity.

**IHC & IF**

Whole mouse brains were collected and fixed with 4% formaldehyde in PBS for 24 h. We next embedded the brains in paraffin, and 5-μm-thick paraffin sections were cut using a microtome and mounted on glass slides. 15 human GBM tissue sections were obtained from BWH. Commercial human GBM tissue array containing 70 GBM patient samples and 10 normal brain tissue samples was purchased from US Biomax (GL805e). Haematoxylin–eosin (H&E), Wnt7b (1:125, Abcam, #ab94915), Beta-Catenin (1:50, Cell Signaling Technology, #9562), and Iba1 (1:500, Wako #19741) staining was then performed. Anti-mouse Wnt7b was detected by DAB oxidation (IHC). Beta-Catenin, Iba1, and Wnt7b were detected by a cyanine3 (Cy3) fluorescence-conjugated secondary anti-rabbit antibody (IF, 1:200). For apoptosis analysis, mouse brain sections were stained with ApopTag fluorescein (Sigma-Aldrich, #S7160). IF sections were counterstained with DAPI (1:1000). Antigen retrieval was done on pH 9 solution at 97 °C for 20 minutes. To prevent nonspecific staining, sections were incubated with 5% normal donkey serum in PBS before incubation with the respective primary and secondary antibodies.

**Quantification of IF images**

Stained sections were imaged with X20 objective lens using AxioScan Z1 slide scanner (Zeiss). All slides in each experiment and quantification were taken in the same imaging profile. Quantification of Wnt7b and Beta-catenin positive cells was done using open source software, QuPath 3 First, the region of interest (ROI) was set in each slide as a cell-dense region for the mouse whole brain tissue slide, and whole tissue region for human GBM tissue slide. Total cell detection in ROI was done in each slide based on DAPI staining, followed by detection of specific cells expressing Cy3 signal using the ‘single measurement classifier’ function in the software. Final quantification was calculated as the percentage of Cy3 signal-positive cells among the total cell number in ROI.

**RNA-seq**

RNA-Seq was performed according to 4 at the Massachusetts Institute of Technology BioMicro Center. Tumor samples were harvested at day 12 post-treatment initiation. The quality of RNA samples was confirmed using a fragment analyser (Advanced Analytical Technologies, Inc.) before Illumina libraries were prepared and indexed from ~250 ng of total RNA using the Kapa Hyperprep kit following the manufacturer’s recommendations (Roche). Libraries were confirmed using the fragment analyzer and quantified by qPCR before pooling and sequencing on an Illumina NextSeq500 using 40 + 40 paired end reads. Samples were demultiplexed using custom scripts allowing a single mismatch to the index sequencing.

**RNA-seq analysis of published dataset** 5

A bulk RNAseq count matrix was obtained from the GEO database (Accession number: GSE121810). We used the DESeq2 package in R to normalize the count matrix. Using the normalized counts barplots and boxplots were made using the ggplot2 package in R.

**Supplementary Figure 1**

**Wnt7b and Ctnnb1 are elevated in GBM post αPD1 therapy and correlate negatively with OS, TIL fraction and PFS.**

a) Expression of *Wnt7b* and *Ctnnb1* in a published human glioblastoma Bulk RNAseq dataset comprising 29 GBM patients. Bar-plots and box-plots depict the counts of *Wnt7b* (a) and *Ctnnb1* (b) genes for individual patients treated with neoadjuvant + adjuvant (N+A group) or adjuvant pembrolizumab (A group). p-value and adjusted p-value after multiple comparisons testing using Bonferroni’s method are given. Bulk RNA-seq analysis does not show a significant difference in Wnt7b and Ctnnb1 expression between neoadjuvant + adjuvant αPD1 (N+A) and adjuvant αPD1 (A) groups, as per adjusted p-values. c) A weak negative correlation exists between Wnt7b and Ctnnb1 expression with TIL fraction. d) Deconvolution of the GLASS gene expression dataset of 168 GBM patient tumors 6 by applying CIBERSORTx 7 using reference cell-state signatures derived from 55, 284 single-transcriptomes from 11 adult patients spanning glioma subtypes and time points 8 shows that Wnt4 and Wnt6 are predominantly expressed in fibroblasts and pericytes.

**Supplementary Figure 2**

**GBM TME populations that express other Wnts & elevated Wnt7b in 15 GBM patients.**

a) Violin plot of single cell RNA-seq of 28 GBM patient tumors from GBM_GSE131928_Smartseq2 dataset 9 (http://tisch.comp-genomics.org/home/) showing the expression *of Wnt7b* in the tumor and its microenvironment. b) GBM patient samples were stained for Wnt7b protein using IF. Images of 3 representative patients from a total of 15 patients is shown. DAPI stain is shown in blue. Negative control is without a primary antibody but with anti-Cy3 secondary antibody staining. Scale bar, 500 µM. c) Quantification of Wnt7b staining as compared to the negative control is shown.

**Supplementary Figure 3**

**Elevated Wnt expression in 005GSC**.

a) *In vitro* screening for the expression of 19 Wnt ligands relative to GAPDH in 005GSC and CT-2A. b) *in vivo* mRNA expression of *Wnt5a*, *Wnt7a*, *Wnt7b* in normal brain, 005GSC and CT-2A. The y-axis is in log scale.

**Supplementary Figure 4**

**WNT974 modestly reduces proliferation of 005GSC at higher concentrations**.

a) MTT assay was performed to measure % viable 005GSC cells in increasing concentrations of WNT974 at 72 h post-treatment. b) For apoptosis analysis using WNT974, αPD1 or the combination, mouse brains were harvested in a time-matched manner, embedded in paraffin, sectioned, and stained with ApopTag fluorescein (Sigma-Aldrich, #S7160). Sections were counterstained with DAPI (1:1000).

**Supplementary Figure 5**

**Response to therapy is partly due to reduced levels of Wnt7b/β-catenin in 005GSC tumor cells.**

a) C57BL/6 mice were orthotopically implanted with 30,000 005-GSC-GFP. Mice were randomized at 3-4 mm3 into control, WNT974, αPD1, and WNT974+αPD1. Mice were treated with 250ug αPD1 or rat IgG i.p. once every 3 days for a total of 4 doses, WNT974 or equivalent methylcellulose was given by oral gavage at the dose of 5mg/kg once daily for 15 days and a time-matched histological analysis and Western blot were performed. b) Tumor weight in mg at the time of harvest (day 15) of control mice as compared to Response 1 mice and Response 2 mice is shown. c) Western blot was performed on tumor tissue lysates treated with WNT974+αPD1 (n=6) or vehicle + IgG (n=5) at the same time point as b) with antibodies as indicated. *p value<0.05, ****p<0.0001, One-way ANOVA followed by a test for multiple comparisons of means.

**Supplementary Figure 6**

**WNT974 and αPD1 does not affect the microglial and macrophage populations.**

a) Immunofluorescence for Iba1 was performed on treated tissues in a time-matched manner. Iba1+ cells that include microglia, macrophages and monocytes was quantified per /mm2 area, b) Flow cytometric analysis of treated time-matched tissues was performed and CD11b+ % in CD45% (myeloid cells) and (**c**) F4/80+ % in CD45+CD11b+% (macrophage-like cells) was graphed.

**Supplementary Figure 7**

**WNT974 and αPD1 reduce VCAM1 protein level.**

a) Western blot showing theVCAM1 protein levels in treated time-matched tissues (n=3 per group) and its quantification with the treatment arms mentioned. Beta-actin is used as a loading control * p<0.05, ** p<0.01, ***p<0.001. One-Way ANOVA followed by multiple means comparison test. (b) Out of the 49 putative ligand-receptor interactions, p values, FDR and Pearson correlations coefficients of the ligand VCAM1 for receptors ITGB7 and ITB1 obtained from longitudinal GBM patient biopsies and single cell sequencing analysis are indicated.

**Supplementary Figure 8**

**WNT974 and αPD1 do not affect the % of T cells.** Flow cytometric analysis of treated time-matched tissues was performed and CD4+ (%) (a) and CD8+ (%) (b) of TCR+ cells were plotted.

**Supplementary Table S1**

Summary of the key findings of previous publications that have correlated Wnt pathway gene expression with anti-tumor immunity and/or used Wnt pathway inhibitors in combination with checkpoint blockade in extracranial tumors.

**Supplementary Table S2 (patients’ demographics)**

The clinical characteristics such as age, gender, IDH1 mutation status, MGMT promoter methylation status, treatment regimen (such as TMZ/Radiation, ICB, bevacizumab) of GBM patients in which Wnt7b staining was performed.

| **Patient and tumor characteristics (n=15)** | | | |
| --- | --- | --- | --- |
| Recurrent/residual | 9 (60%) |  |  |
| Newly diagnosed | 6 (40%) |  |  |
| Age at diagnosis (years) | | Sex, no (%) | |
| Median | 58 | Male | 7 (47%) |
| Range | 34-85 | Female | 8 (53%) |
| IDH1 R132H mutation status, no (%) | | MGMT promoter methylation status, no (%) | |
| No | 14 (93%) | Methylated | 6 (40%) |
| Yes | 1 (7%) | Unmethylated | 9 (60%) |
| Treatment | | Survival (months) | |
| Adjuvant chemo | 14 (93%) | Median | 40 |
| Adjuvant Radiation | 14 (93%) | Range | 3-64 |
| Bevacizumab | 7 (47%) |  |  |
| ICB | 4 (27%) |  |  |

**References**

1. Kloepper, J.*, et al.* Ang-2/VEGF bispecific antibody reprograms macrophages and resident microglia to anti-tumor phenotype and prolongs glioblastoma survival. *Proceedings of the National Academy of Sciences of the United States of America* **113**, 4476-4481 (2016).

2. Griveau, A.*, et al.* A Glial Signature and Wnt7 Signaling Regulate Glioma-Vascular Interactions and Tumor Microenvironment. *Cancer cell* **33**, 874-889 e877 (2018).

3. Bankhead, P.*, et al.* QuPath: Open source software for digital pathology image analysis. *Scientific reports* **7**, 16878 (2017).

4. Seano, G.*, et al.* Solid stress in brain tumours causes neuronal loss and neurological dysfunction and can be reversed by lithium. *Nat Biomed Eng* **3**, 230-245 (2019).

5. Cloughesy, T.F.*, et al.* Neoadjuvant anti-PD-1 immunotherapy promotes a survival benefit with intratumoral and systemic immune responses in recurrent glioblastoma. *Nature medicine* **25**, 477-486 (2019).

6. Varn, F.S.*, et al.* Glioma progression is shaped by genetic evolution and microenvironment interactions. *Cell* **185**, 2184-2199 e2116 (2022).

7. Newman, A.M.*, et al.* Determining cell type abundance and expression from bulk tissues with digital cytometry. *Nat Biotechnol* **37**, 773-782 (2019).

8. Johnson, K.C.*, et al.* Single-cell multimodal glioma analyses identify epigenetic regulators of cellular plasticity and environmental stress response. *Nature genetics* **53**, 1456-1468 (2021).

9. Neftel, C.*, et al.* An Integrative Model of Cellular States, Plasticity, and Genetics for Glioblastoma. *Cell* **178**, 835-849 e821 (2019).
